# Supplementary material
Source: PubMed Central journal article supplement (PMC4402650)
Supplement: NIHMS680333-supplement-Supplemental_files.pdf [file NIHMS680333-supplement-Supplemental_files.pdf]

## Supplementary Online Content

Grandjean P, Andersen EW, Budtz-Jørgensen E, et al. Serum vaccine antibody concentrations in children exposed to perfluorinated compounds. *JAMA*. 2012;307(4):391-397.

**eTable 1.** Geometric Means (95% CIs) for Serum Concentrations of Specific Antibodies at Age 5 (Prebooster) and 7 Years by Tertile Groups of PFC Concentrations in Maternal Pregnancy Serum and 5-Year Serum

**eTable 2.** Estimated Percentage Differences (95% CIs) in Specific Antibody Concentrations at 5 Years Prebooster, 5 Years Postbooster, and 7 Years per 2-Fold Increase of the Concentrations of Total, Linear, and Branched PFOS Isomers in Maternal or 5-Year Serum

**eTable 3.** Estimated Percentage Differences (95% CIs) in Specific Antibody Concentrations at 5 Years Prebooster, 5 Years Postbooster, 7 Years, Before and After Adjustment for Year 5 Prebooster, per Doubling of PFC 5-Year or Maternal PFC Exposure, With Adjustment for Covariates and Milk-PCB and Serum-PCB at Age 5 Years

**eTable 4.** Odds Ratios (95% CIs) for Inadequate Antibody Concentrations at 5 Years Prebooster and 7 Years

This supplementary material has been provided by the authors to give readers additional information about their work.

**eTABLE 1.** Geometric Means (95% CIs) for Serum Concentrations of Specific Antibodies at Age 5 (Prebooster) and 7 Years by Tertile Groups of PFC Concentrations in Maternal Pregnancy Serum and 5-Year Serum<sup>a</sup>

|                   | Age 5 by maternal PFC |                      |                      | Age 5 by 5-year PFC  |                      |                      | Age 7 by 5-year PFC  |                      |                      |
|-------------------|-----------------------|----------------------|----------------------|----------------------|----------------------|----------------------|----------------------|----------------------|----------------------|
|                   | Low                   | Medium               | High                 | Low                  | Medium               | High                 | Low                  | Medium               | High                 |
| <b>Tetanus</b>    |                       |                      |                      |                      |                      |                      |                      |                      |                      |
| PFOS              | 0.22<br>(0.17; 0.28)  | 0.25<br>(0.20; 0.31) | 0.22<br>(0.18; 0.28) | 0.27<br>(0.21; 0.33) | 0.24<br>(0.19; 0.30) | 0.21<br>(0.17; 0.26) | 2.26<br>(1.69; 3.02) | 2.06<br>(1.53; 2.77) | 1.68<br>(1.24; 2.27) |
| PFOA              | 0.25<br>(0.20; 0.32)  | 0.21<br>(0.17; 0.26) | 0.23<br>(0.18; 0.29) | 0.26<br>(0.20; 0.32) | 0.24<br>(0.20; 0.30) | 0.21<br>(0.17; 0.26) | 2.37<br>(1.75; 3.20) | 2.01<br>(1.53; 2.65) | 1.68<br>(1.24; 2.28) |
| PFHxS             | 0.26<br>(0.21; 0.33)  | 0.18<br>(0.14; 0.23) | 0.25<br>(0.20; 0.31) | 0.27<br>(0.22; 0.33) | 0.23<br>(0.18; 0.29) | 0.21<br>(0.16; 0.26) | 2.56<br>(1.91; 3.42) | 2.03<br>(1.52; 2.70) | 1.49<br>(1.11; 2.01) |
| PFNA              | 0.22<br>(0.18; 0.28)  | 0.21<br>(0.17; 0.27) | 0.26<br>(0.21; 0.32) | 0.24<br>(0.19; 0.30) | 0.23<br>(0.19; 0.29) | 0.23<br>(0.19; 0.29) | 2.16<br>(1.62; 2.89) | 2.03<br>(1.51; 2.73) | 1.82<br>(1.36; 2.45) |
| PFDA              | 0.23<br>(0.18; 0.29)  | 0.24<br>(0.19; 0.30) | 0.22<br>(0.18; 0.27) | 0.25<br>(0.20; 0.31) | 0.24<br>(0.19; 0.30) | 0.22<br>(0.17; 0.27) | 2.37<br>(1.78; 3.14) | 1.93<br>(1.43; 2.59) | 1.69<br>(1.25; 2.28) |
| <b>Diphtheria</b> |                       |                      |                      |                      |                      |                      |                      |                      |                      |
| PFOS              | 0.18<br>(0.14; 0.23)  | 0.15<br>(0.12; 0.19) | 0.12<br>(0.09; 0.15) | 0.16<br>(0.13; 0.21) | 0.15<br>(0.12; 0.19) | 0.13<br>(0.11; 0.17) | 1.02<br>(0.78; 1.34) | 0.90<br>(0.68; 1.19) | 0.75<br>(0.57; 0.99) |
| PFOA              | 0.16<br>(0.12; 0.20)  | 0.12<br>(0.10; 0.16) | 0.15<br>(0.12; 0.19) | 0.16<br>(0.12; 0.20) | 0.15<br>(0.12; 0.19) | 0.14<br>(0.11; 0.18) | 1.04<br>(0.79; 1.38) | 0.85<br>(0.66; 1.10) | 0.82<br>(0.62; 1.09) |
| PFHxS             | 0.15<br>(0.12; 0.19)  | 0.14<br>(0.11; 0.18) | 0.14<br>(0.11; 0.18) | 0.16<br>(0.12; 0.20) | 0.13<br>(0.11; 0.17) | 0.16<br>(0.12; 0.20) | 0.99<br>(0.76; 1.31) | 0.82<br>(0.62; 1.07) | 0.88<br>(0.67; 1.16) |

© 2012 American Medical Association. All rights reserved.

**eTable 1 (Continued)**

|      |                      |                      |                      |                      |                      |                      |                      |                      |                      |
|------|----------------------|----------------------|----------------------|----------------------|----------------------|----------------------|----------------------|----------------------|----------------------|
| PFNA | 0.16<br>(0.12; 0.20) | 0.14<br>(0.11; 0.18) | 0.13<br>(0.11; 0.17) | 0.16<br>(0.13; 0.21) | 0.15<br>(0.11; 0.19) | 0.14<br>(0.11; 0.17) | 0.93<br>(0.71; 1.22) | 0.94<br>(0.71; 1.24) | 0.82<br>(0.62; 1.07) |
| PFDA | 0.18<br>(0.14; 0.23) | 0.15<br>(0.12; 0.19) | 0.12<br>(0.09; 0.15) | 0.16<br>(0.13; 0.21) | 0.15<br>(0.12; 0.20) | 0.13<br>(0.10; 0.17) | 0.99<br>(0.76; 1.29) | 0.89<br>(0.68; 1.18) | 0.78<br>(0.59; 1.03) |

<sup>a</sup>Estimates at age 5 are for a boy of mean age (4.95 years), at age 7 for a boy of mean age (7.5 years) and booster type 1 (tetanus and diphtheria only). Tertile groups for maternal PFC: PFOS (6.47+, 16.87+, 21.25+), PFOA (0.82+, 2.80+, 3.81+), PFHxS (0.62+, 2.91+, 7.33+), PFNA (0.12+, 0.51+, 0.70+) and PFDA age 5 (0.03+, 0.23+, 0.34+).

Tertile groups for PFOS age 5 (3.33+, 14.50+, 19.53+), PFOA age 5 (0.77+, 3.54+, 4.61+), PFHxS age 5 (0.02+, 0.50+, 0.76+), PFNA age 5 (0.39+, 0.81+, 1.13+) and PFDA age 5 (0.05+, 0.23+, 0.33+)

**eTable 2.** Estimated Percentage Differences (95% CIs) in Specific Antibody Concentrations at 5 Years Prebooster, 5 Years Postbooster, and 7 Years per 2-Fold Increase of the Concentrations of Total, Linear, and Branched PFOS Isomers in Maternal or 5-Year Serum<sup>a</sup>

|                   | Maternal PFC           |                       |                       |                                    | PFC at age 5 years    |                       |                       |                                    |
|-------------------|------------------------|-----------------------|-----------------------|------------------------------------|-----------------------|-----------------------|-----------------------|------------------------------------|
|                   | Pre year 5             | Post year 5           | Year 7                | Year 7, Adjusted for Age 5 Results | Pre year 5            | Post year 5           | Year 7                | Year 7, Adjusted for Age 5 Results |
|                   | % Change (95% CI)      | % Change (95% CI)     | % Change (95% CI)     | % Change (95% CI)                  | % Change (95% CI)     | % Change (95% CI)     | % Change (95% CI)     | % Change (95% CI)                  |
| <b>Tetanus</b>    | <b>n=509</b>           | <b>n=419</b>          | <b>n= 424</b>         | <b>n=380</b>                       | <b>n=537</b>          | <b>n=440</b>          | <b>n=408</b>          | <b>n=401</b>                       |
| Total PFOS        | -10.1<br>(-31.9;18.7)  | -2.3<br>(-28.6;33.6)  | 35.3<br>(-3.9;90.6)   | 33.1<br>( 1.5;74.6)                | -11.9<br>(-30.0;10.9) | -28.5<br>(-45.5;-6.1) | -23.8<br>(-44.3; 4.2) | -11.4<br>(-30.5;12.8)              |
| n-PFOS            | -14.7<br>(-35.0;12.0)  | -4.5<br>(-29.7;29.9)  | 36.1<br>(-2.7;90.6)   | 37.1<br>( 5.1;78.9)                | -11.7<br>(-29.0; 9.9) | -29.9<br>(-45.8;-9.2) | -19.3<br>(-39.7; 8.0) | -7.8<br>(-26.3;15.5)               |
| br-PFOS           | 6.5<br>(-15.7;34.5)    | 2.8<br>(-21.7;34.9)   | 22.2<br>(-7.8;62.0)   | 11.2<br>(-11.0;38.8)               | -10.4<br>(-28.3;12.0) | -22.0<br>(-40.0; 1.3) | -24.7<br>(-44.6; 2.5) | -13.1<br>(-31.5;10.3)              |
| <b>Diphtheria</b> | <b>n=510</b>           | <b>n=419</b>          | <b>n= 424</b>         | <b>n=382</b>                       | <b>n=537</b>          | <b>n=440</b>          | <b>n=408</b>          | <b>n=403</b>                       |
| Total PFOS        | -38.6<br>(-54.7;-16.9) | -20.6<br>(-37.5; 0.9) | -19.7<br>(-41.8;10.7) | -10.0<br>(-32.6;20.0)              | -16.0<br>(-34.9; 8.3) | -15.5<br>(-31.5; 4.3) | -27.6<br>(-45.8;-3.3) | -20.6<br>(-38.2; 2.1)              |
| n-PFOS            | -42.6<br>(-57.3;-22.7) | -22.6<br>(-38.8;-2.2) | -22.9<br>(-43.8; 5.8) | -10.6<br>(-32.7;18.8)              | -17.5<br>(-35.2; 5.1) | -16.1<br>(-31.3; 2.4) | -24.2<br>(-42.1;-0.8) | -16.4<br>(-33.8; 5.5)              |
| br-PFOS           | -16.8<br>(-35.6; 7.5)  | -11.8<br>(-28.4; 8.7) | -5.7<br>(-27.7;22.9)  | -5.8<br>(-25.3;18.9)               | -8.1<br>(-28.2;17.7)  | -10.9<br>(-27.3; 9.2) | -21.1<br>(-40.6; 4.9) | -18.3<br>(-36.1; 4.5)              |

<sup>a</sup>Covariate adjustments as in Table 3 (n-PFOS, linear; br-PFOS, branched isomers).

**eTable 3.** Estimated Percentage Differences (95% CIs) in Specific Antibody Concentrations at 5 Years Prebooster, 5 Years Postbooster, 7 Years, Before and After Adjustment for Year 5 Prebooster, per Doubling of PFC 5-Year or Maternal PFC Exposure, With Adjustment for Covariates and Milk-PCB and Serum-PCB at Age 5 Years<sup>a</sup>

|                   | Maternal PFC           |                        |                        |                                                 | PFC at age 5 years     |                        |                         |                                                 |
|-------------------|------------------------|------------------------|------------------------|-------------------------------------------------|------------------------|------------------------|-------------------------|-------------------------------------------------|
|                   | Pre year 5             | Post year 5            | Year 7                 | Year 7, Adjusted for Age 5 Results <sup>a</sup> | Pre year 5             | Post year 5            | Year 7                  | Year 7, Adjusted for Age 5 Results <sup>a</sup> |
|                   | % Change (95% CI)                               | % Change (95% CI)      | % Change (95% CI)      | % Change (95% CI)       | % Change (95% CI)                               |
| <b>Tetanus</b>    | <b>n=449</b>           | <b>n=369</b>           | <b>n=350</b>           | <b>n=339</b>                                    | <b>n=472</b>           | <b>n=385</b>           | <b>n=364</b>            | <b>n=357</b>                                    |
| PFOS              | -7.66<br>(-32.7;26.6)  | 4.00<br>(-26.6;47.4)   | 26.67<br>(-13.8;86.1)  | 28.58<br>(-3.7;71.7)                            | -21.78<br>(-40.5; 2.8) | -33.21<br>(-51.4;-8.2) | -32.19<br>(-53.1;-1.9)  | -10.66<br>(-32.7; 18.6)                         |
| PFOA              | -12.17<br>(-30.9;11.7) | 16.97<br>(-10.2;52.4)  | 11.46<br>(-15.7;47.4)  | 14.35<br>(-7.5; 41.4)                           | -24.63<br>(-42.4;-1.4) | -9.61<br>(-32.7;21.3)  | -35.42<br>(-53.3;-10.7) | -20.03<br>(-37.8; 2.9)                          |
| PFHxS             | -8.19<br>(-17.5; 2.1)  | 0.19<br>(-14.2;17.1)   | -1.95<br>(-15.9;14.3)  | 9.53<br>(-2.5; 23.0)                            | -11.49<br>(-23.7; 2.7) | -19.78<br>(-31.7;-5.8) | -20.68<br>(-33.9;-4.8)  | -12.26<br>(-23.7; 0.9)                          |
| PFNA              | 16.64<br>(-8.5;48.8)   | -2.71<br>(-26.6;29.0)  | 15.89<br>(-14.6;57.2)  | 0.09<br>(-20.3; 25.8)                           | -10.42<br>(-27.7;11.0) | -21.43<br>(-38.7; 0.7) | -22.44<br>(-39.9; 0.0)  | -15.04<br>(-29.9; 3.0)                          |
| PFDA              | -3.60<br>(-22.2;19.5)  | -3.45<br>(-24.5;23.4)  | 3.17<br>(-20.6;34.1)   | 3.96<br>(-14.5; 26.5)                           | -17.43<br>(-31.0;-1.2) | -21.64<br>(-36.0;-4.1) | -29.80<br>(-43.1;-13.4) | -17.83<br>(-30.0; -3.5)                         |
| <b>Diphtheria</b> | <b>n=450</b>           | <b>n=369</b>           | <b>n=350</b>           | <b>N=341</b>                                    | <b>n=473</b>           | <b>n=385</b>           | <b>n= 364</b>           | <b>n=359</b>                                    |
| PFOS              | -28.72<br>(-49.6; 0.8) | -23.75<br>(-41.9; 0.1) | -24.76<br>(-48.5; 9.9) | -15.26<br>(-38.8;17.3)                          | -14.06<br>(-36.6;16.5) | -15.96<br>(-34.8; 8.3) | -38.01<br>(-56.3;-12.1) | -29.64<br>(-48.2; -4.4)                         |
| PFOA              | -9.43<br>(-30.4;17.9)  | -8.00<br>(-25.3;13.3)  | -24.08<br>(-42.3;-0.2) | -18.46<br>(-35.6; 3.2)                          | -4.29<br>(-28.9;28.9)  | 0.27<br>(-20.8;26.9)   | -23.08<br>(-43.6; 4.9)  | -20.05<br>(-39.0; 4.8)                          |
| PFHxS             | -8.78<br>(-18.9; 2.6)  | -7.91<br>(-18.5; 4.0)  | -8.83<br>(-21.6; 6.0)  | -1.83<br>(-13.7; 11.7)                          | 11.34<br>(-5.6;31.3)   | -7.42<br>(-18.7; 5.4)  | -11.74<br>(-25.8; 5.0)  | -15.75<br>(-27.6; -1.9)                         |
| PFNA              | -7.63<br>(-29.4;20.8)  | -19.21<br>(-35.1; 0.6) | -15.99<br>(-37.8;13.5) | -15.31<br>(-34.3; 9.1)                          | -16.33<br>(-34.1; 6.2) | -15.17<br>(-30.3; 3.2) | -19.05<br>(-36.5; 3.1)  | -16.81<br>(-32.6; 2.6)                          |
| PFDA              | -19.35<br>(-36.3; 2.1) | -24.88<br>(-37.9;-9.2) | -10.03<br>(-30.5;16.5) | -4.73<br>(-23.5; 18.7)                          | -20.91<br>(-35.2;-3.5) | -8.68<br>(-22.2; 7.2)  | -20.05<br>(-34.6;-2.2)  | -13.58<br>(-27.5; 3.0)                          |

<sup>a</sup>Covariate adjustments as in Table 3.

**eTABLE 4.** Odds Ratios (95% CIs) for Inadequate Antibody Concentrations at 5 Years Prebooster and 7 Years<sup>a</sup>

| Exposure          | Maternal PFC          |        |                    |        | PFC age 5 years       |        |                       |        |
|-------------------|-----------------------|--------|--------------------|--------|-----------------------|--------|-----------------------|--------|
|                   | OR (95% CI)<br>year 5 | P      | OR (95% CI) year 7 | P      | OR (95% CI)<br>year 5 | P      | OR (95% CI)<br>year 7 | P      |
| <b>Tetanus</b>    | <b>n=509</b>          |        | <b>n=424</b>       |        | <b>n=509</b>          |        | <b>n=386</b>          |        |
| PFOS              | 1.16 (0.71; 1.89)     | 0.5474 | 0.53 (0.16; 1.79)  | 0.3105 | 1.16 (0.77; 1.74)     | 0.4749 | 2.61 (0.77; 8.92)     | 0.1245 |
| PFOA              | 1.21 (0.82; 1.78)     | 0.3400 | 0.73 (0.27; 1.95)  | 0.5312 | 1.38 (0.91; 2.10)     | 0.1313 | 4.20 (1.54; 11.44)    | 0.0065 |
| PFHxS             | 1.05 (0.88; 1.25)     | 0.5708 | 1.35 (0.79; 2.31)  | 0.2721 | 1.11 (0.89; 1.39)     | 0.3349 | 1.78 (1.08; 2.93)     | 0.0334 |
| PFNA              | 0.95 (0.68; 1.33)     | 0.7643 | 0.71 (0.28; 1.81)  | 0.4735 | 1.14 (0.82; 1.58)     | 0.4361 | 1.61 (0.73; 3.55)     | 0.2516 |
| PFDA              | 1.06 (0.77; 1.46)     | 0.7032 | 0.82 (0.36; 1.86)  | 0.6347 | 1.23 (0.93; 1.64)     | 0.1501 | 1.64 (0.78; 3.47)     | 0.1915 |
| <b>Diphtheria</b> | <b>n=510</b>          |        | <b>n=424</b>       |        | <b>n=510</b>          |        | <b>n=386</b>          |        |
| PFOS              | 2.48 (1.55; 3.97)     | 0.0001 | 2.33 (0.88; 6.14)  | 0.0843 | 1.60 (1.10; 2.34)     | 0.0138 | 2.38 (0.89; 6.35)     | 0.0820 |
| PFOA              | 1.44 (1.01; 2.06)     | 0.0445 | 2.11 (0.89; 4.99)  | 0.0802 | 1.19 (0.81; 1.73)     | 0.3725 | 3.27 (1.43; 7.51)     | 0.0057 |
| PFHxS             | 1.12 (.96; 1.31)      | 0.1557 | 0.81 (0.52; 1.27)  | 0.3477 | 1.04 (0.85; 1.28)     | 0.6898 | 1.48 (0.96; 2.28)     | 0.0845 |
| PFNA              | 1.43 (1.05; 1.97)     | 0.0236 | 1.17 (0.55; 2.49)  | 0.6756 | 1.38 (1.02; 1.86)     | 0.0364 | 1.81 (0.97; 3.39)     | 0.0714 |
| PFDA              | 1.69 (1.25; 2.30)     | 0.0005 | 1.05 (0.53; 2.08)  | 0.8917 | 1.36 (1.04; 1.77)     | 0.0228 | 1.72 (0.95; 3.13)     | 0.0734 |

<sup>a</sup>Results are adjusted for age and sex at 5 years pre-booster, and age, sex and booster type at 7 years.
